# Supplementary material for: Undergraduate data science degrees emphasize computer science and statistics but fall short in ethics training and domain-specific context
Source: PeerJ Comput Sci. 2021 Mar 25;7:e441. doi: 10.7717/peerj-cs.441 (PMC8022506; doi:10.7717/peerj-cs.441)
Supplement: Supplemental Information 7 [file peerj-cs-07-441-s007.xlsx]

## Sheet: Ohio State
Requirement	Courses	Course Units	Course Category	Stats.min	Stats.max	CS.min	CS.max	Domain.min	Domain.max	Major.min	Major.max	Min	Max
Description				37	51	27	37	0	27	78	98	78	98
Prerequisites				10	10	3	3					13	13
	Math 1151	5	Stats
	Math 1152	5	Stats
	CSE 1223	3	CS
Core												51	51
	CSE 2221	4	CS			4	4
	CSE 2231	4	CS			4	4
	CSE 2321	3	CS			3	3
	CSE 2421 or 3430	4	CS			4	4
	Math 2568	3	Stats	3	3
	CSE 3241	3	CS			3	3
	Stat 3201	3	Stats	3	3
	Stat 3202	4	Stats	4	4
	Stat 3301	3	Stats	3	3
	Stat 3302	3	Stats	3	3
	Stat 3303	3	Stats	3	3
	ISE 3230	3	Stats	3	3
	Stat 4620	2	Stats	2	2
	CSE 5242 or 3244	3	CS			3	3
	CSE 5243	3	CS			3	3
	CSE 5544 or ISE 5760	3	Stats	3	3
Min/max from specializations				0	14	0	10	0	27			14	34
Biomedical Informatics				3	3			27	27
Business Analytics				9	9			9	9
Computational Analytics						0	10	0	10
Data Visualization				9	9			3	3
Social Science Analytics				0	14			0	12
Specializations
Biomedical Informatics				3	3			27	27			34	34
	MolGen 5660	5	Domain					5	5
	BMI 5710	3	Domain					3	3
	BMI 5720	3	Domain					3	3
	BMI 5730	3	Domain					3	3
	BMI 5740	3	Stats	3	3
Stat 4911	Stat 4911	4	NA
	Chemistry 1110 or 1210	5	Domain					5	5
	Biology 1113	4	Domain					4	4
	Biology 1114	4	Domain					4	4
Business Analytics				9	9			9	9			21	21
	Economics 2001.01	3	Stats
	Economics 2002.01	3	Stats
	BUSADM 3630.05	3	Stats
	BUSADM 3632.05	3	NA
	Electives	9	Domain
Computational Analytics						0	10	0	10			14	14
	Electives (CS)	10	CS			0	10
	Electives (Domain)	10	Domain					0	10
Data Visualization				9	9			3	3			16	16
	DESIGN 5505	3	Stats	3	3
	CSE 5544 (ISE 5760 required)	3	Stats	3	3
	ACCAD 5141	3	Domain					3	3
	ACCAD 5150	3	Stats	3	3
	STAT 4911	4	NA
Social Science Analytics				0	14	0		0	12			19	21
	Methods (1)	2019-03-04	Varies
	Electives (3)	2019-09-10	Varies
	DEPT 4998/4999	3	NA
	STAT 4911	4	NA
Cyber Security

## Sheet: Penn State Applied
Requirement	Courses	Course Units	Course Category	Stats.min	Stats.max	CS.min	CS.max	Domain.min	Domain.max	Major.min	Major.max	Min	Max
Description				47	70	11	31	0	17	88	88	88	88
Semester 1	MATH 140	4	Stats	4	4							4	4
	CMPSC 131	3	CS			3	3					3	3
	DS 200	3	Stats	3	3							3	3
	IST 111S	1	NA									1	1
Semester 2	MATH 141	4	Stats	4	4							4	4
	CMPSC 132	3	CS			3	3					3	3
	STAT 200	4	Stats	4	4							4	4
Semester 3	DS 220	3	Stats	3	3							3	3
	MATH 220	2	Stats	2	2							2	2
	IST 230 or CMPSC 360	3	Stats	3	3							3	3
	STAT 184	2	CS			2	2					2	2
	IST 210	3	Stats	3	3							3	3
Semester 4	DS 300	3	Stats	3	3							3	3
	STAT 318	3	Stats	3	3							3	3
	STAT 380	3	Stats	3	3							3	3
	CAS 100	3	NA									3	3
Semester 5	DS 310	3	Stats	3	3							3	3
	DS 320	3	Stats	3	3							3	3
	DS 330	3	Stats	3	3							3	3
	Application focus #1	3	CS or Stats or Domain	0	3	0	3	0	3			3	3
Semester 6	DS 410	3	CS			3	3					3	3
	DS 442; IST 442; SODA 308; IST 445H; IST 441; DS 402; or IST 462	0-3	Stats	0	3	0	3					3	3
	Application focus #2	3	CS or Stats or Domain	0	3	0	3	0	3			3	3
Semester 7	DS 340W	3	Stats	3	3							3	3
	DS 442; IST 442; SODA 308; IST445H; IST 441; DS 402; or IST 462	0-3	Stats	0	3							3	3	Only one course in this list, DS442 is a CS, but since this list is repeated in semesters 6 & 7, the addition of the units to CS max only occurs for semester 6 (because a student can only get CS credits for that course once).
	Application focus #3	3	CS or Stats or Domain	0	3	0	3	0	3			3	3
Semester 8	DS 440	3	NA									3	3
	Application focus #4	3	CS or Stats or Domain	0	3	0	3	0	3			3	3
	Elective	2	Any	0	2	0	2	0	2			2	2
	Elective	3	Any	0	3	0	3	0	3			3	3

## Sheet: Penn State CS
Requirement	Courses	Course Units	Course Category	Stats.min	Stats.max	CS.min	CS.max	Domain.min	Domain.max	Major.min	Major.max	Min	Max
Description				45	57	18	30	0	0	87	87	87	87
Data Sciences				12	12	3	3					18	18
	IST 210	3	Stats
	DS 220	3	Stats
	DS 300	3	Stats
	DS 340W	3	Stats
	DS 410	3	CS
	DS 440	3	NA
Computer Science & Engineering				6	6	15	15					21	21
	CMPSC 121 or CMPSC 131	3	CS
	CMPSC 122 or CMPSC 132	3	CS
	CMPSC 360	3	Stats
	CMPSC 442	3	CS
	CMPSC 448	3	Stats
	CMPSC 461	3	CS
	CMPSC 465	3	CS
Statistics				13	13							13	13
	STAT 200	4	Stats
	STAT 380	3	Stats
	STAT 414	3	Stats
	STAT 415	3	Stats
Technical Electives
List A	Select 6 units			0	6	0	6					6	6
	CMPSC 450	3	CS
	CMPSC 451	3	Stats
	CMPEN 454	3	CS
	CMPSC 455	3	Stats
	CMPSC 456	3	Stats
List B	Select 6 units			0	6	0	6					6	6
	CMPSC 431W	3	Stats
	EE 456	3	CS
	IST 441	3	Stats
	STAT 416	3	Stats
	STAT 440	3	CS
Communications												9	9
	ENGL 15 GWS	3	NA
	ENGL 202C GWS	3	NA
	CAS 100 A/B	3	NA
Quantification				14	14							14	14
	MATH 140 GQ	4	Stats
	MATH 141 GQ	4	Stats
	MATH 220 GQ	2	Stats
	MATH 230	4	Stats

## Sheet: Stanford
Requirement	Courses	Course Units	Course Category	Stats.min	Stats.max	CS.min	CS.max	Domain.min	Domain.max	Major.min	Major.max	Min	Max
Description				18	19	3	6	0	4	22	26	22	26
	Math 51 or CME 100	5	Stats	5	5							5	5
	CS 106A	3	CS			3	3					3	3
	STATS 32, STATS 48N, STATS 195, or THINK 3	2019-01-04	CS or Domain			0	3	0	4			1	4
	STATS 101	5	Stats	5	5							5	5
Statistics	(select 1)			3	3							3	3
	ECON 102A	3	Stats
	PHIL 166	3	Stats
	STATS 48N	3	Stats
	STATS 141	3	Stats
	STATS 191	3	Stats
	STATS 211	3	Stats
Data Mining	(select 1)			3	3							3	3
	STATS 202	3	Stats
	STATS 216	3	Stats
Methodology	(select 1)			2	3							2	3
	SOC 180A/B		Stats
	SOC126		Stats
	PUBLPOL 105		Stats
	PHIL 166		Stats
	POLISCI 150B		Stats
	LINGUIST 275		Stats
	MS&E 135		Stats
	ENGLISH 184E		Stats
	CS 224W		Stats
	ECON 291		Stats

## Sheet: UA SDS BA
Requirement	Courses	Course Units	Course Category	Stats.min	Stats.max	CS.min	CS.max	Domain.min	Domain.max	Major.min	Major.max	Min	Max	Notes
Description				31	36	4	7	0	18	38	40	38	40	Minor is required (18 units, may or may not be Domain)
Supporting CS (choose one)						4	4					4	4
	CSC 110	4	CS
	CSC 120	4	CS
	ISTA 130	4	CS
Calculus (choose one)				3	5							3	5
	MATH 122A + 122B	5	Stats
	MATH 125	3	Stats
Core
	MATH 129	3	Stats	3	3							3	3
	MATH 223	4	Stats	4	4							4	4
	MATH 313	3	Stats	3	3							3	3
	DATA 363	3	Stats	3	3							3	3
	DATA 375	3	Stats	3	3							3	3
	MATH 464	3	Stats	3	3							3	3
	MATH 466	3	Stats	3	3							3	3
	DATA 467	3	Stats	3	3							3	3
	DATA 469	3	Stats	3	3							3	3
SDS Elective (chose one)				0	3	0	3					3	3
	DATA 367	3	Stats
	DATA 462	3	Stats
	DATA 468	3	Stats
	SIE 440	3	CS

## Sheet: UA SDS BS
Requirement	Courses	Course Units	Course Category	Stats.min	Stats.max	CS.min	CS.max	Domain.min	Domain.max	Major.min	Major.max	Min	Max	Notes
Description				31	42	4	13	7	18	45	54	45	54	Minor is required (18 units, may or may not be Domain)
Supporting CS (choose one)						4	4					4	4
	CSC 110	4	CS
	CSC 120	4	CS
	ISTA 130	4	CS
Calculus (choose one)				3	5							3	5
	MATH 122A + 122B	5	Stats
	MATH 125	3	Stats
Core
	MATH 129	3	Stats	3	3							3	3
	MATH 223	4	Stats	4	4							4	4
	MATH 313	3	Stats	3	3							3	3
	DATA 363	3	Stats	3	3							3	3
	DATA 375	3	Stats	3	3							3	3
	MATH 464	3	Stats	3	3							3	3
	MATH 466	3	Stats	3	3							3	3
	DATA 467	3	Stats	3	3							3	3
	DATA 469	3	Stats	3	3							3	3
SDS Elective (chose one)				0	3	0	3					3	3
	DATA 367	3	Stats
	DATA 462	3	Stats
	DATA 468	3	Stats
	SIE 440	3	CS
Laboratory Science Courses								7	8			7	8
	PHYS 141 & PHYS 142/241	2019-07-08	Domain
	PHYS 161H & PHYS 162/261H	8	Domain
	CHEM 151, 152	4	Domain
	CHEM 141, 142, 143, 144	8	Domain
	CHEM 161, 162, 163, 164	8	Domain
	MCB 181, 181L OR ECOL 182R, 182L	4	Domain
	PSIO 201, 202	8	Domain
	GEOS 251 & GEOS 302/304/308/322	2019-07-08	Domain
Application Courses
	Several options, examples listed below			0	6	0	6	0	6			0	6
	CSC 460	3	Stats
	CSC 345	3	CS
	ECOL 302	4	Domain

## Sheet: UC Berkeley
Requirement	Courses	Course Units	Course Category	Stats.min	Stats.max	CS.min	CS.max	Domain.min	Domain.max	Major.min	Major.max	Min	Max
Description				23	52	7	27	0	18	51	62	51	62
Lower Division
	COMPSCI/STAT/INFO C8	4	Stats	4	4							4	4
	Math 1A, Math 10A, or Math 16A	2019-03-04	Stats	3	4							3	4
	Math 1B	4	Stats	4	4							4	4
	Math 54, Stat 89A, EL ENG 16A & 16B, or Physics 89	4	Stats	4	4							4	4
	COMPSCI 61A, COMPSCI 88, or ENGIN 7	2019-03-04	CS			3	4					3	4
	CS 61B	4	CS			4	4					4	4
Upper Division
	Data 100	4	Stats	4	4							4	4
	Computation & Inference	2019-07-08	Stats; CS	0	8	0	8					7	8
	Probability	4	Stats	4	4							4	4
	Modeling et al	2019-03-04	Stats; CS	0	4	0	4					4	4
	Human context	2019-03-04	Stats; Domain	0	4			0	4			4	4
Domain
Many programs				0	12	0	7	0	14			6	14
Applied Mathematics & Modeling				4	12	0	7	0	0
Business & Industrial Analytics				0	4			6	10
Cognition								9	12
Computational Biology Methods				0	4	0	4	4	12
Data Arts & Humanities				0	3			8	12
Ecology & the Environment								8	12
Economics								12	12
Environment, Resource Management, & Society								12	12
Evolution & Biodiversity								9	12
Geospatial Information & Technology								8	14
Human Biology								10	12
Human & Population Health								9	12
Human Behavior & Psychology								9	12
Inequalities in Society								10	12
Linguistic Sciences								10	12
Molecular Biology & Genomics								10	11
Neurosciences								9	11
Organizations & the Economy								10	12
Physical Science Analytics								9	12
Quantitative Social Sciences				0	4			4	12
Robotics				4	4			7	8
Social Welfare, Health, & Poverty								10	12
Social Policy & Law								10	12
Sustainable Development & Engineering								9	12
Urban Science								5	11
Domain emphasis details
Applied Mathematics & Modeling				4	12	0	7
	Lower Division			4	4
	Upper Division			0	8	0	7
Business & Industrial Analytics				0	4			6	10
	Lower Division			0	4			0	4
	Upper Division							6	6
Cognition								9	12
	Lower Division							3	4
	Upper Division							6	8
Computational Biology Methods				0	4	0	4	4	12
	Lower Division			0	4			0	4
	Upper Division					0	4	4	8
Data Arts & Humanities				0	3			5	12
	Lower Division							2	4
	Upper Division			0	3			3	8
Ecology & the Environment								8	12
	Lower Division							2	4
	Upper Division							6	8
Economics								12	12
	Lower Division							4	4
	Upper Division							8	8
Environment, Resource Management, & Society								12	12
	Lower Division							4	4
	Upper Division							8	8
Evolution & Biodiversity								9	12
	Lower Division							3	4
	Upper Division							6	8
Geospatial Information & Technology								8	14
	Lower Division							2	4
	Upper Division							6	10
Human Biology								10	12
	Lower Division							3	4
	Upper Division							7	8
Human & Population Health								9	12
	Lower Division							3	4
	Upper Division							6	8
Human Behavior & Psychology								9	12
	Lower Division							3	4
	Upper Division							6	8
Inequalities in Society								10	12
	Lower Division							4	4
	Upper Division							6	8
Linguistic Sciences								10	12
	Lower Division							4	4
	Upper Division							6	8
Molecular Biology & Genomics								10	11
	Lower Division							3	3
	Upper Division							7	8
Neurosciences								9	11
	Lower Division							3	3
	Upper Division							6	8
Organizations & the Economy								10	12
	Lower Division							4	4
	Upper Division							6	8
Physical Science Analytics								9	12
	Lower Division							3	4
	Upper Division							6	8
Quantitative Social Sciences				0	4			4	12
	Lower Division			0	4			0	4
	Upper Division							4	8
Robotics				4	4			7	8
	Lower Division			4	4
	Upper Division							7	8
Social Welfare, Health, & Poverty								10	12
	Lower Division							4	4
	Upper Division							6	8
Social Policy & Law								10	12
	Lower Division							4	4
	Upper Division							6	8
Sustainable Development & Engineering								9	12
	Lower Division							3	4
	Upper Division							6	8
Urban Science								5	11
	Lower Division							2	3
	Upper Division							3	8

## Sheet: UC Davis
Requirement	Courses	Course Units	Course Category	Stats.min	Stats.max	CS.min	CS.max	Domain.min	Domain.max	Major.min	Major.max	Min	Max
Description				67	71	8	12	0	0	79	79	79	79
Preparatory Subject Matter												27	27
	MAT 21A-B-C-D	16	Stats	16	16
	MAT 22A	3	Stats	3	3
	ECS 32A or ECS 36A	4	CS			4	4
	STA 12, 23, or 100	4	Stats	4	4
Depth Subject Matter												52	52
	STA 106	4	Stats	4	4
	STA 108	4	Stats	4	4
	STA 131A	4	Stats	4	4
	STA 131B	4	Stats	4	4
	STA 131C	4	Stats	4	4
	STA 141A	4	Stats	4	4
	STA 141B	4	Stats	4	4
	STA 141C	4	CS			4	4
	STA 135	4	Stats	4	4
	STA 160	4	Stats	4	4
	ECS 171 or STA 142A	4	Stats	4	4
	MAT 167	4	Stats	4	4
One course from				0	4	0	4
	STA 104	4	Stats
	STA 137	4	Stats
	STA 138	4	Stats
	STA 142A	4	Stats
	STA 142B	4	Stats
	STA 144	4	Stats
	STA 145	4	Stats
	MAT 128A	4	Stats
	MAT 160	4	Stats
	ECS 122A	4	Stats
	ECS 165A	4	Stats
	ECS 158	4	CS
	ECS 163	4	Stats
	STA 199, 194HA, 194HB	4	Stats

## Sheet: CU Boulder
Requirement	Courses	Course Units	Course Category	Stats.min	Stats.max	CS.min	CS.max	Domain.min	Domain.max	Major.min	Major.max	Min	Max
Description				44	44	8	8	6	18	70	70	70	70
Mathematical Foundations				7	7							7	7
	APPM 2350 or MATH 2400	4	Stats
	APPM 3310	3	Stats
Computation
	STAT 2600	4	Stats	4	4							4	4
Statistics Theory				9	9							9	9
	STAT 3100	3	Stats
	STAT 4520	3	Stats
	APPM 4560	3	Stats
Statistical Modeling				15	15							15	15
	STAT 3400	3	Stats
	STAT 4400	3	Stats
	STAT 4610	3	Stats
	STAT 4630	3	Stats
	APPM 4500	3	Stats
(select 3)				9	9							9	9
	APPM 4530		Stats
	APPM 4510		Stats
	STAT 4430		Stats
	STAT 4540		Stats
	STAT 4700		Stats
Ancillary						8	8					8	8
	CSCI 1300 or CSCI 1320	4	CS
	CSCI 2270	4	CS
Outside area of emphasis								6	18			18	18
	Varies	2019-06-18	Domain

## Sheet: Illinois
Requirement	Courses	Course Units	Course Category	Stats.min	Stats.max	CS.min	CS.max	Domain.min	Domain.max	Major.min	Major.max	Min	Max
Description				6	14	0	3	0	4	12	15	12	15
Fundamentals	(Choose 2)			6	7	0	0	0	0			6	7
	STAT 200	3	Stats
	STAT 212	3	Stats
	STAT 420	3	Stats
	STAT 432	3	Stats
	STAT 448	4	Stats
Data	(Choose 1)			0	4	0	3	0	0			3	4
	MATH 225	3	Stats
	MATH 415	2019-03-04	Stats
	STAT 385	3	CS
	STAT 428	3	Stats
	STAT 440	3	Stats
	STAT 480	3	Stats
Interdisciplinary	(Choose 1)			0	3	0	0	0	4			3	4
	ECON 471	3	Domain
	GEOG 371	4	Domain
	GEOG 379	3	Domain
	LING 402	3	Domain
	LING 406	2019-03-04	Domain
	MCB 432	3	Domain
	PS 230	3	Domain
	SOC 380	4	Domain
	SOC 488	3	Domain
	STAT 443	3	Stats

[truncated: 8 more sheets: Iowa, Maryland, Wash ACMS, Wash CS, Wash HCDE, Wash INFO, Wash STATS, Wash State]
